# Supplementary material for: Characterization of novel Acidobacteria exopolysaccharides with potential industrial and ecological applications
Source: PubMed Central journal article supplement (PMC5259719; doi:10.1038/srep41193), 2017-01-24
Supplement: srep41193-s1.pdf [file srep41193-s1.pdf]

## **Characterization of novel *Acidobacteria* exopolysaccharides with potential industrial and ecological applications**

Anna M. Kielak<sup>1\*</sup>, Tereza C. L. Castellane<sup>2\*</sup>, Joao C. Campanharo<sup>2</sup>, Luiz A. Colnago<sup>3</sup>, Ohana Y. A. Costa<sup>1</sup>, Maria L. C. Silva<sup>4</sup>, Johannes A. van Veen<sup>1</sup>, Eliana G. M. Lemos<sup>2</sup> & Eiko E. Kuramae<sup>1#</sup>

<sup>1</sup>Netherlands Institute of Ecology (NIOO-KNAW), Department of Microbial Ecology, P.O. Box 50, 6700 AB, Wageningen, the Netherlands. <sup>2</sup>São Paulo State University (Unesp), School of Agricultural and Veterinarian Sciences, Rod. Prof. Paulo Donato Castellane km 5, CEP 14884-900, Jaboticabal, Brazil. <sup>3</sup>Embrapa Instrumentação, Rua XV de Novembro, 1452, CEP 13560-970, São Carlos, Brazil,. <sup>4</sup>Faculdade de Ciências e Tecnologia (Unesp), Departamento de Química e Bioquímica, Rua Roberto Símonsens, 305, CEP 19060-900, Presidente Prudente, Brazil.

\*Equal contribution

#Corresponding author: E. E. Kuramae

e-mail: e.kuramae@nioo.knaw.nl

Tel/FAX: +31 (0)317 473 493

Netherlands Institute of Ecology (NIOO-KNAW)

Droevendaalsesteeg 10

6708 PB Wageningen, The Netherlands

Running title: Novel Acidobacterial exopolysaccharide

**Supplementary Material**

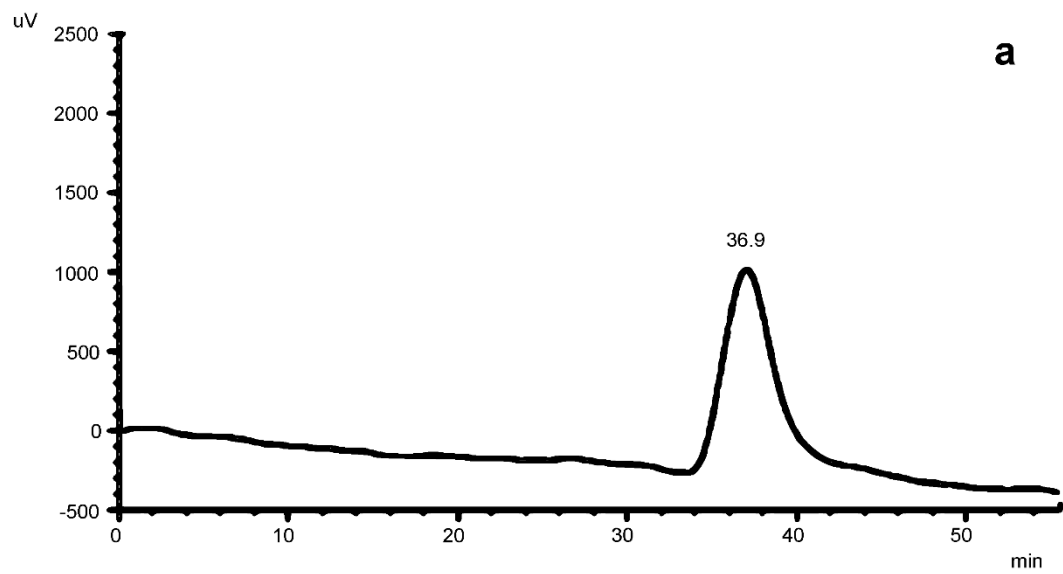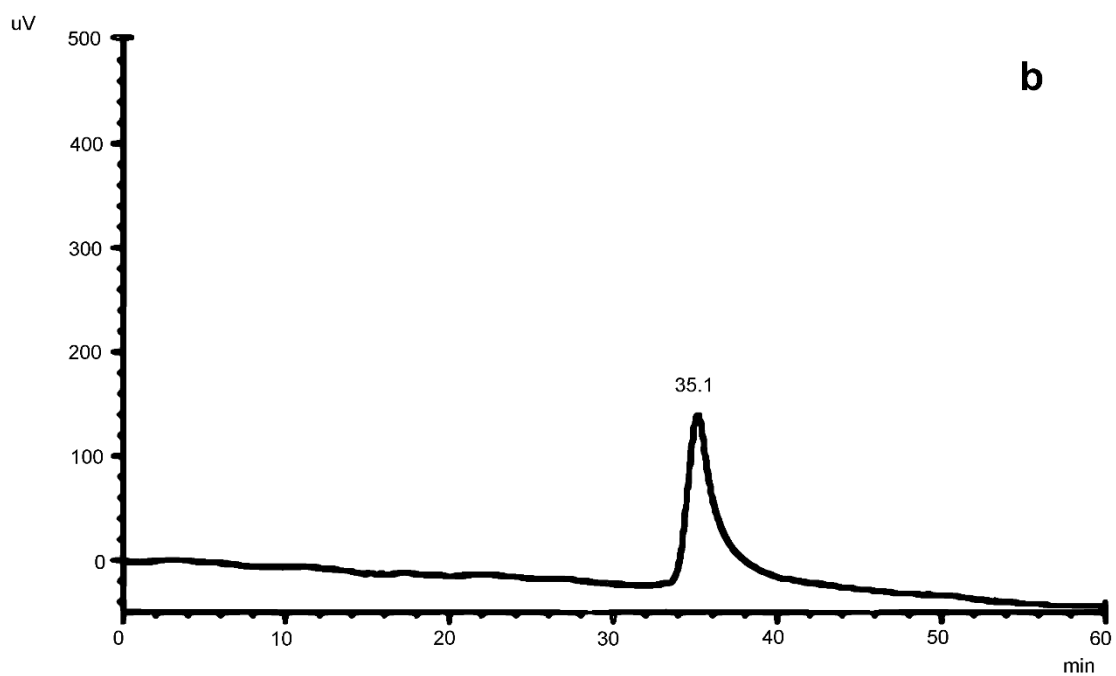

**Fig. S1.** High performance size-exclusion chromatography (HPSEC) equipped with a refractive index detector (RID) analysis of the *Acidobacteria* strains WH15 (a) and 5B5 (b).

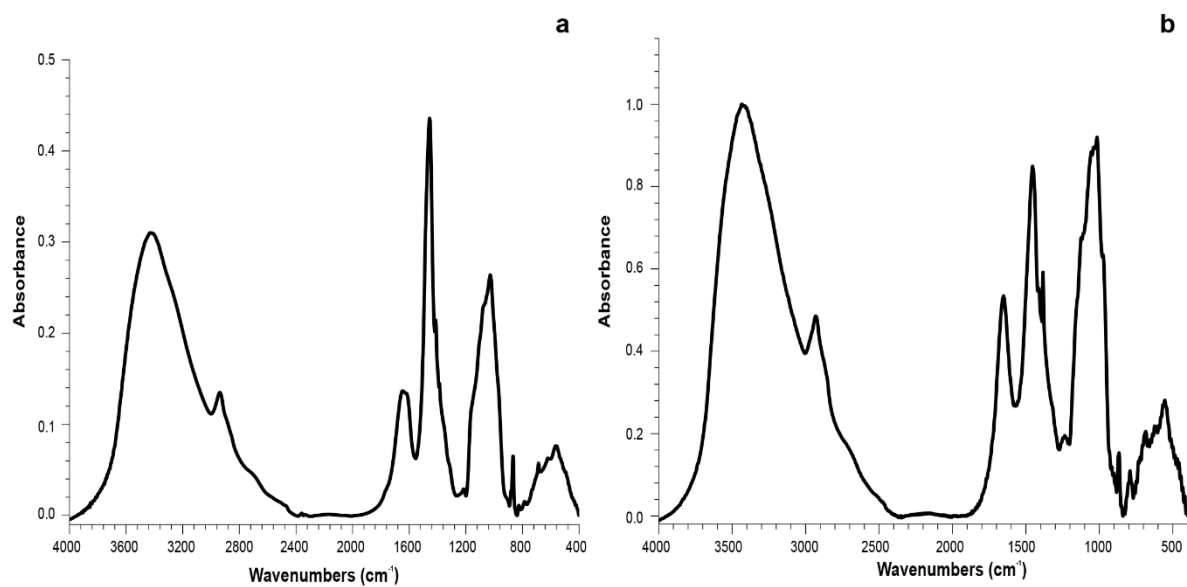

**Fig. S2.** Fourier transform infrared (FT-IR) spectra of exopolysaccharide produced by *Granulicella* sp. (a) WH15 and (b) 5B5 strains. These are original absorbance spectra. All spectra normalized by the absorption band at 1050 cm<sup>-1</sup>.

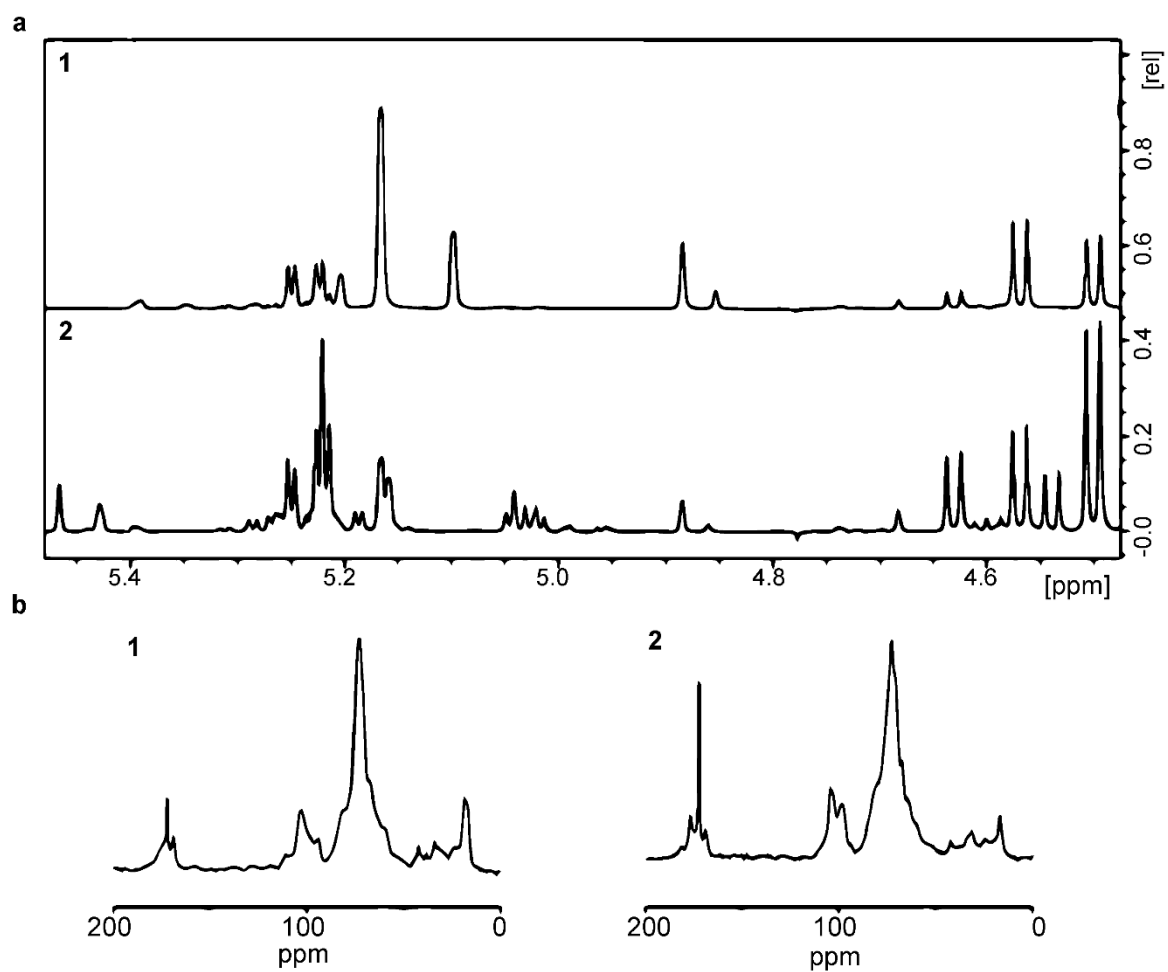

**Fig. S3.** Spectra of the EPS produced by *Granulicella* sp. (1) 5B5 and (2) WH15 strains. (a)  $^1\text{H}$  NMR spectrum (b)  $^{13}\text{C}$  NMR spectrum.
